# Supplementary material for: Head-Out Water-Based Protocols to Assess Cardiorespiratory Fitness—Systematic Review
Source: PubMed Central journal article supplement (PMC7579306; doi:10.3390/ijerph17197215), 2020-10-02
Supplement: ijerph-17-07215-s001.pdf [file ijerph-17-07215-s001.pdf]

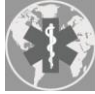

1

**Table S1.** Example of search parameters.

---

**Search details for PubMed:**

---

((("oxygen consumption"[MeSH Terms] OR ("oxygen"[All Fields] AND "consumption"[All Fields]) OR "oxygen consumption"[All Fields]) OR ("oxygen"[MeSH Terms] OR "oxygen"[All Fields]) AND uptake[All Fields]) OR ("cardiorespiratory fitness"[MeSH Terms] OR ("cardiorespiratory"[All Fields] AND "fitness"[All Fields]) OR "cardiorespiratory fitness"[All Fields]) OR (Cardiorespiratory[All Fields] AND response[All Fields]) OR (Aerobic[All Fields] AND capacity[All Fields]) OR (Aerobic[All Fields] AND fitness[All Fields])) AND (Aqua[All Fields] OR Aquatic[All Fields] OR Water-based[All Fields])) AND (("exercise"[MeSH Terms] OR "exercise"[All Fields]) OR Testing[All Fields] OR ("research design"[MeSH Terms] OR ("research"[All Fields] AND "design"[All Fields]) OR "research design"[All Fields] OR "test"[All Fields]) OR Protocol[All Fields])

---

2

3

4

Table 2. Quality assessment of included studies.

| Author,<br>Year                     | Study<br>Purpos<br>e | Literatu<br>re | Desig<br>n | Sample                                           |                                         | Outcomes                                     |                                       | Protocol                                       |                                   |                                    | Results                                                                        |                                                     |                                                 |                                       | Conclusions were<br>Appropriate<br>Given Study<br>Methods and<br>Results? | Tota<br>l |
|-------------------------------------|----------------------|----------------|------------|--------------------------------------------------|-----------------------------------------|----------------------------------------------|---------------------------------------|------------------------------------------------|-----------------------------------|------------------------------------|--------------------------------------------------------------------------------|-----------------------------------------------------|-------------------------------------------------|---------------------------------------|---------------------------------------------------------------------------|-----------|
|                                     |                      |                |            | Was the<br>Sample<br>Describe<br>d in<br>Detail? | Was<br>Sample<br>Size<br>Justifie<br>d? | Were<br>the<br>Outcom<br>es<br>Reliable<br>? | Were<br>the<br>Outcom<br>es<br>Valid? | Protocol<br>was<br>Describe<br>d in<br>Detail? | Contaminati<br>on was<br>Avoided? | Cointerventi<br>on was<br>Avoided? | Results<br>were<br>Reported<br>in Terms of<br>Statistical<br>Significanc<br>e? | Were the<br>Analysis<br>Methods<br>Appropriat<br>e? | Clinical<br>Importan<br>ce was<br>Reported<br>? | Drop<br>Outs<br>were<br>Reporte<br>d? |                                                                           |           |
| Alberton<br>et al., 2013<br>[41]    | 1                    | 1              | 0          | 1                                                | 0                                       | 0                                            | 0                                     | 1                                              | 1                                 | 1                                  | 1                                                                              | 1                                                   | 1                                               | 1                                     | 1                                                                         | 11        |
| Alberton<br>et al., 2013<br>[42]    | 1                    | 1              | 0          | 1                                                | 0                                       | 0                                            | 1                                     | 1                                              | 1                                 | 1                                  | 1                                                                              | 1                                                   | 1                                               | 1                                     | 1                                                                         | 12        |
| Alberton<br>et al., 2014<br>[43]    | 1                    | 1              | 0          | 1                                                | 0                                       | 0                                            | 1                                     | 1                                              | 1                                 | 1                                  | 1                                                                              | 1                                                   | 1                                               | 1                                     | 1                                                                         | 12        |
| Alberton<br>et al., 2016<br>[44]    | 1                    | 1              | 0          | 1                                                | 1                                       | 0                                            | 1                                     | 1                                              | 1                                 | 1                                  | 1                                                                              | 1                                                   | 1                                               | 1                                     | 1                                                                         | 13        |
| Antunes et<br>al., 2015<br>[45]     | 1                    | 1              | 0          | 1                                                | 1                                       | 0                                            | 1                                     | 1                                              | 1                                 | 1                                  | 1                                                                              | 1                                                   | 1                                               | 1                                     | 1                                                                         | 13        |
| Bartolome<br>u et al.,<br>2017 [46] | 1                    | 1              | 0          | 1                                                | 1                                       | 0                                            | 1                                     | 1                                              | 0                                 | 0                                  | 1                                                                              | 1                                                   | 1                                               | 1                                     | 1                                                                         | 11        |
| Broman et<br>al., 2006<br>[33]      | 1                    | 1              | 0          | 1                                                | 0                                       | 0                                            | 1                                     | 1                                              | 0                                 | 0                                  | 1                                                                              | 1                                                   | 0                                               | 1                                     | 1                                                                         | 9         |
| Brown et<br>al., 1997<br>[26, 27]   | 1                    | 1              | 0          | 1                                                | 0                                       | 0                                            | 1                                     | 1                                              | 0                                 | 0                                  | 1                                                                              | 1                                                   | 1                                               | 1                                     | 1                                                                         | 10        |
| Brown et<br>al., 1998<br>[52]       | 1                    | 1              | 0          | 1                                                | 0                                       | 0                                            | 1                                     | 1                                              | 0                                 | 0                                  | 1                                                                              | 1                                                   | 0                                               | 1                                     | 1                                                                         | 9         |



|                                          |   |   |   |   |   |   |   |   |   |   |   |   |   |   |   |    |
|------------------------------------------|---|---|---|---|---|---|---|---|---|---|---|---|---|---|---|----|
| Kruel et al., 2013<br>[50]               | 1 | 1 | 0 | 1 | 1 | 0 | 1 | 1 | 1 | 1 | 1 | 1 | 0 | 1 | 1 | 12 |
| Melton-Rogers et al., 1996<br>[56]       | 1 | 1 | 0 | 1 | 0 | 0 | 1 | 1 | 0 | 0 | 1 | 1 | 1 | 1 | 1 | 10 |
| Mercer et al., 1998<br>[57]              | 1 | 1 | 0 | 1 | 0 | 0 | 1 | 1 | 0 | 0 | 1 | 1 | 1 | 1 | 1 | 10 |
| Meredith-Jones et al., 2009<br>[36]      | 1 | 1 | 0 | 1 | 0 | 1 | 1 | 1 | 0 | 0 | 1 | 1 | 1 | 1 | 1 | 11 |
| Michaud et al., 1995<br>[34]             | 1 | 1 | 0 | 1 | 0 | 0 | 1 | 1 | 1 | 1 | 1 | 1 | 1 | 1 | 1 | 12 |
| Michaud et al., 1995<br>[40]             | 1 | 1 | 0 | 1 | 0 | 1 | 1 | 1 | 1 | 1 | 1 | 1 | 1 | 1 | 1 | 13 |
| Nagle et al., 2017<br>[31]               | 1 | 1 | 1 | 1 | 0 | 1 | 0 | 1 | 0 | 0 | 1 | 1 | 1 | 0 | 1 | 10 |
| Ogonowski-Slodownik et al., 2019<br>[58] | 1 | 1 | 1 | 1 | 0 | 1 | 1 | 1 | 1 | 1 | 1 | 1 | 1 | 1 | 1 | 14 |
| Phillips et al., 2008<br>[35]            | 1 | 1 | 0 | 1 | 0 | 0 | 1 | 1 | 0 | 0 | 1 | 1 | 1 | 1 | 1 | 10 |
| Pinto et al., 2016<br>[64]               | 1 | 1 | 0 | 1 | 0 | 0 | 1 | 1 | 0 | 1 | 1 | 1 | 1 | 1 | 1 | 11 |
| Schaal et al., 2012<br>[38]              | 1 | 1 | 0 | 1 | 0 | 0 | 1 | 1 | 0 | 1 | 1 | 1 | 1 | 1 | 1 | 11 |
| Silvers et al., 2007<br>[65]             | 1 | 1 | 0 | 1 | 0 | 0 | 1 | 1 | 1 | 0 | 1 | 1 | 1 | 1 | 1 | 11 |
| Silvers et al., 2008<br>[66]             | 1 | 1 | 0 | 1 | 0 | 1 | 0 | 1 | 0 | 0 | 1 | 1 | 1 | 1 | 1 | 10 |

---

|                             |   |   |   |   |   |   |   |   |   |   |   |   |   |   |   |    |
|-----------------------------|---|---|---|---|---|---|---|---|---|---|---|---|---|---|---|----|
| Svedenhag et al., 1992 [59] | 1 | 1 | 0 | 1 | 0 | 0 | 1 | 1 | 0 | 0 | 1 | 1 | 0 | 1 | 1 | 9  |
| Town et al., 1991 [36]      | 1 | 1 | 0 | 0 | 0 | 0 | 1 | 1 | 1 | 0 | 1 | 1 | 1 | 1 | 1 | 10 |
| Yazigi et al., 2013 [51]    | 1 | 1 | 0 | 1 | 0 | 0 | 1 | 1 | 1 | 1 | 1 | 1 | 1 | 1 | 1 | 12 |

---

5  
6  
7
